# Supplementary material for: Establishment of a non-Westernized gut microbiota in men who have sex with men is associated with sexual practices
Source: PubMed Central journal article supplement — Cell Rep Med. 2024 Feb 15;5(3):101426. doi: 10.1016/j.xcrm.2024.101426 (PMC10982974; doi:10.1016/j.xcrm.2024.101426), 2024-02-15
Supplement: mmc1.pdf [file mmc1.pdf]

**Cell Reports Medicine, Volume 5**

**Supplemental information**

**Establishment of a non-Westernized  
gut microbiota in men who have sex with men  
is associated with sexual practices**

**Kun D. Huang, Lena Amend, Eric J.C. Gálvez, Till-Robin Lesker, Romulo de Oliveira, Agata Bielecka, Aitor Blanco-Míguez, Mireia Valles-Colomer, Isabel Ruf, Edoardo Pasolli, Jan Buer, Nicola Segata, Stefan Esser, Till Strowig, and Jan Kehrman**

## Supplemental Information

**A**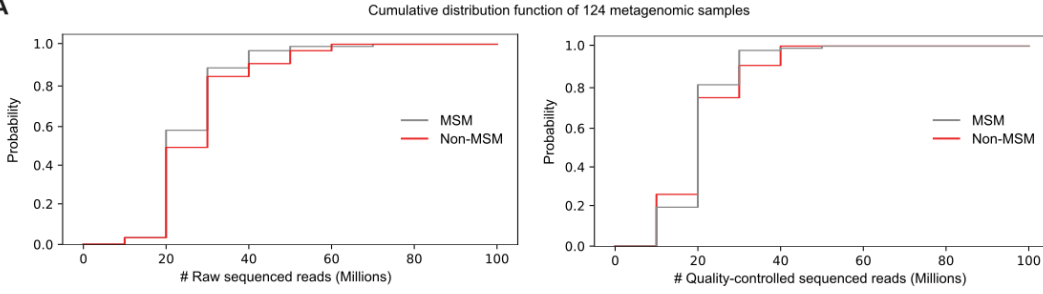**B**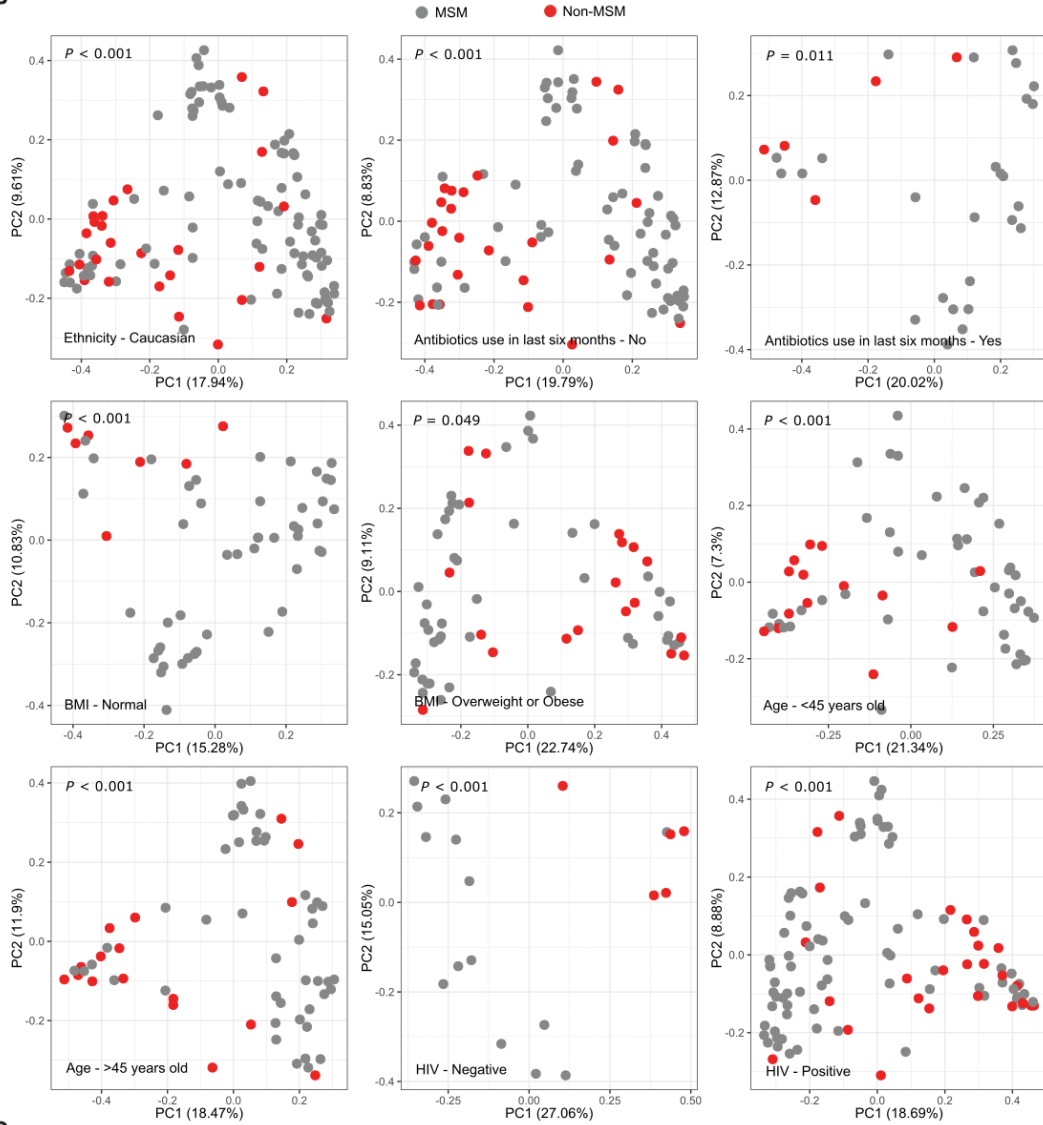**C**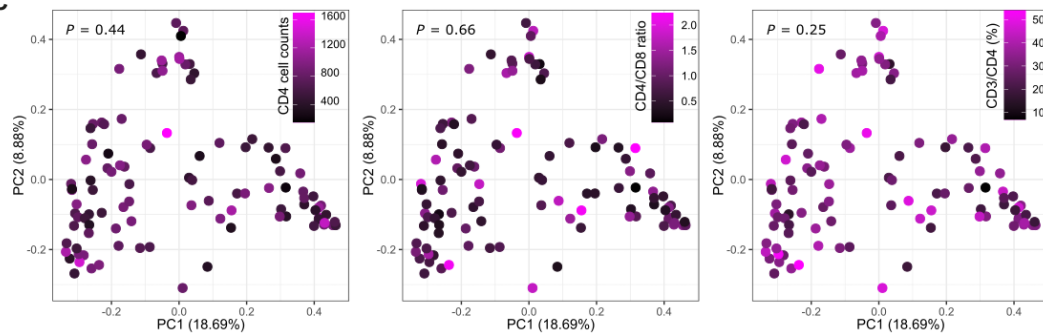

**Figure S1. Basic statistics of sequencing reads and comparisons of the taxonomic composition of MSM samples with that of Non-MSM samples for anthropometric factors and HIV infections, Related to Figure 1, Table 1 and Table 2.** **A** Cumulative distribution function of sequenced reads in MSM and non-MSM samples (Wilcoxon rank-sum test, raw reads (left)  $P = 0.4308$ ; quality-controlled reads (right)  $P = 0.9608$ ). **B** Principal coordinate analysis (PCoA) based on MetaPhlAn 4 <sup>[S1]</sup> abundance profiles between MSM and non-MSM samples for each subset of samples stratified by covariates (PERMANOVA, all  $P < 0.05$ ). **C** PCoA analysis based on MetaPhlAn 4 abundance profiles of a HIV-infected individuals ( $N = 103$ , Table 2) regarding HIV infection factors including CD4 cell counts, CD4/CD8 ratio and CD3/CD4 (%) (PERMANOVA, all  $P > 0.05$ ).

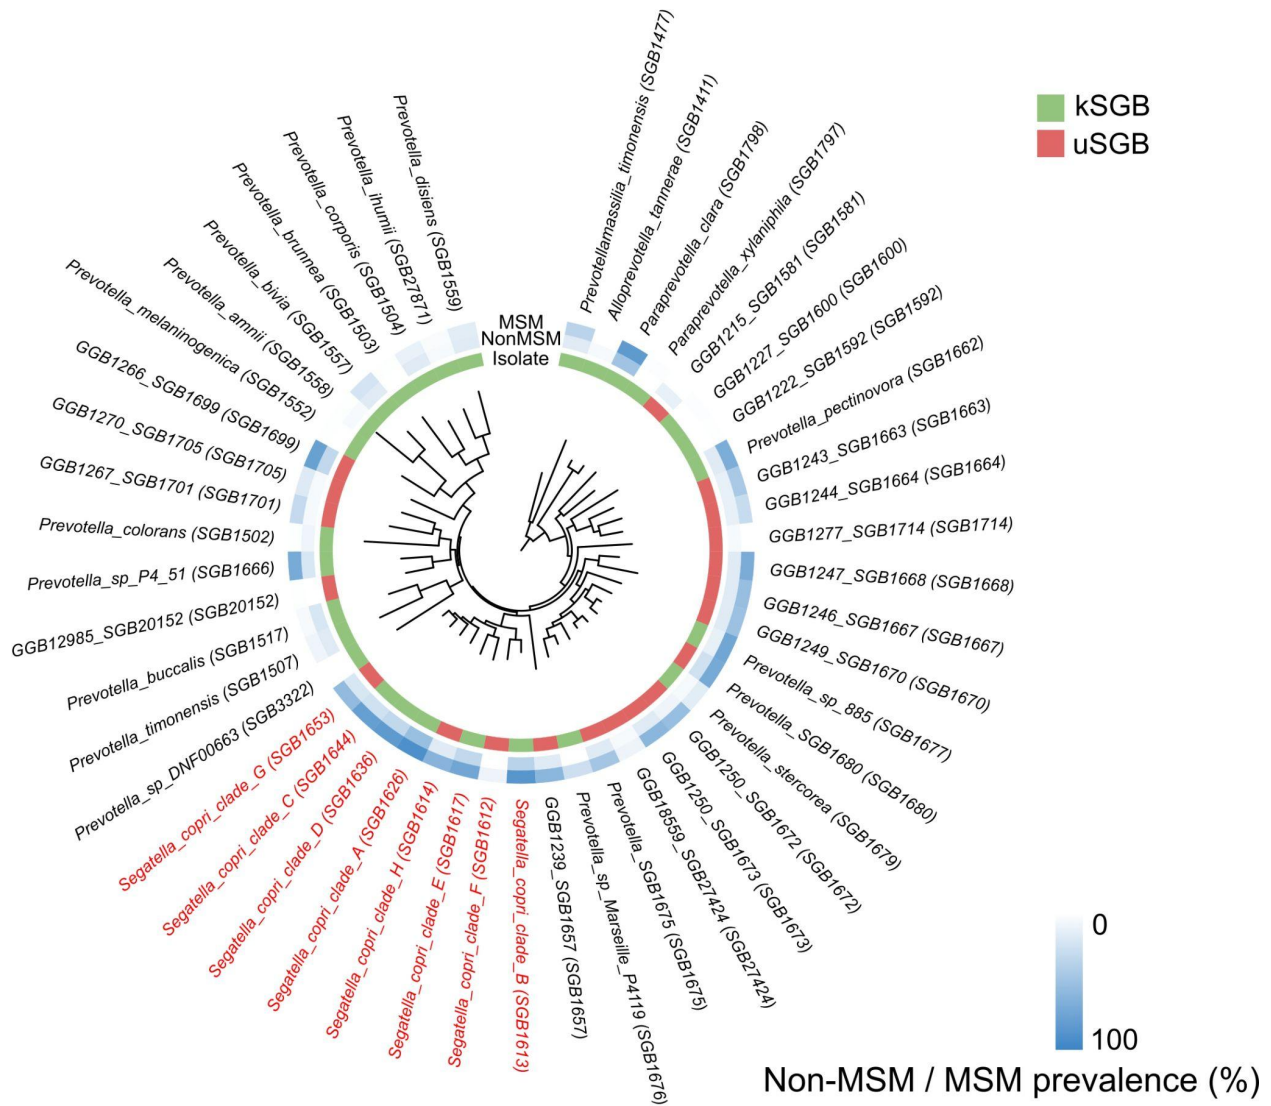

**Figure S2.** The phylogenetic structure of *Prevotellaceae* species members reconstructed using PhyloPhIAn 3.0 <sup>[S2]</sup> and visualized using iTOL v6 <sup>[S3]</sup>, Related to **Figure 2**. Labels of *S. copri* complex clades were highlighted in red. Prevalence indicates the percentage of individuals carrying that species member in the MSM or non-MSM population, respectively.

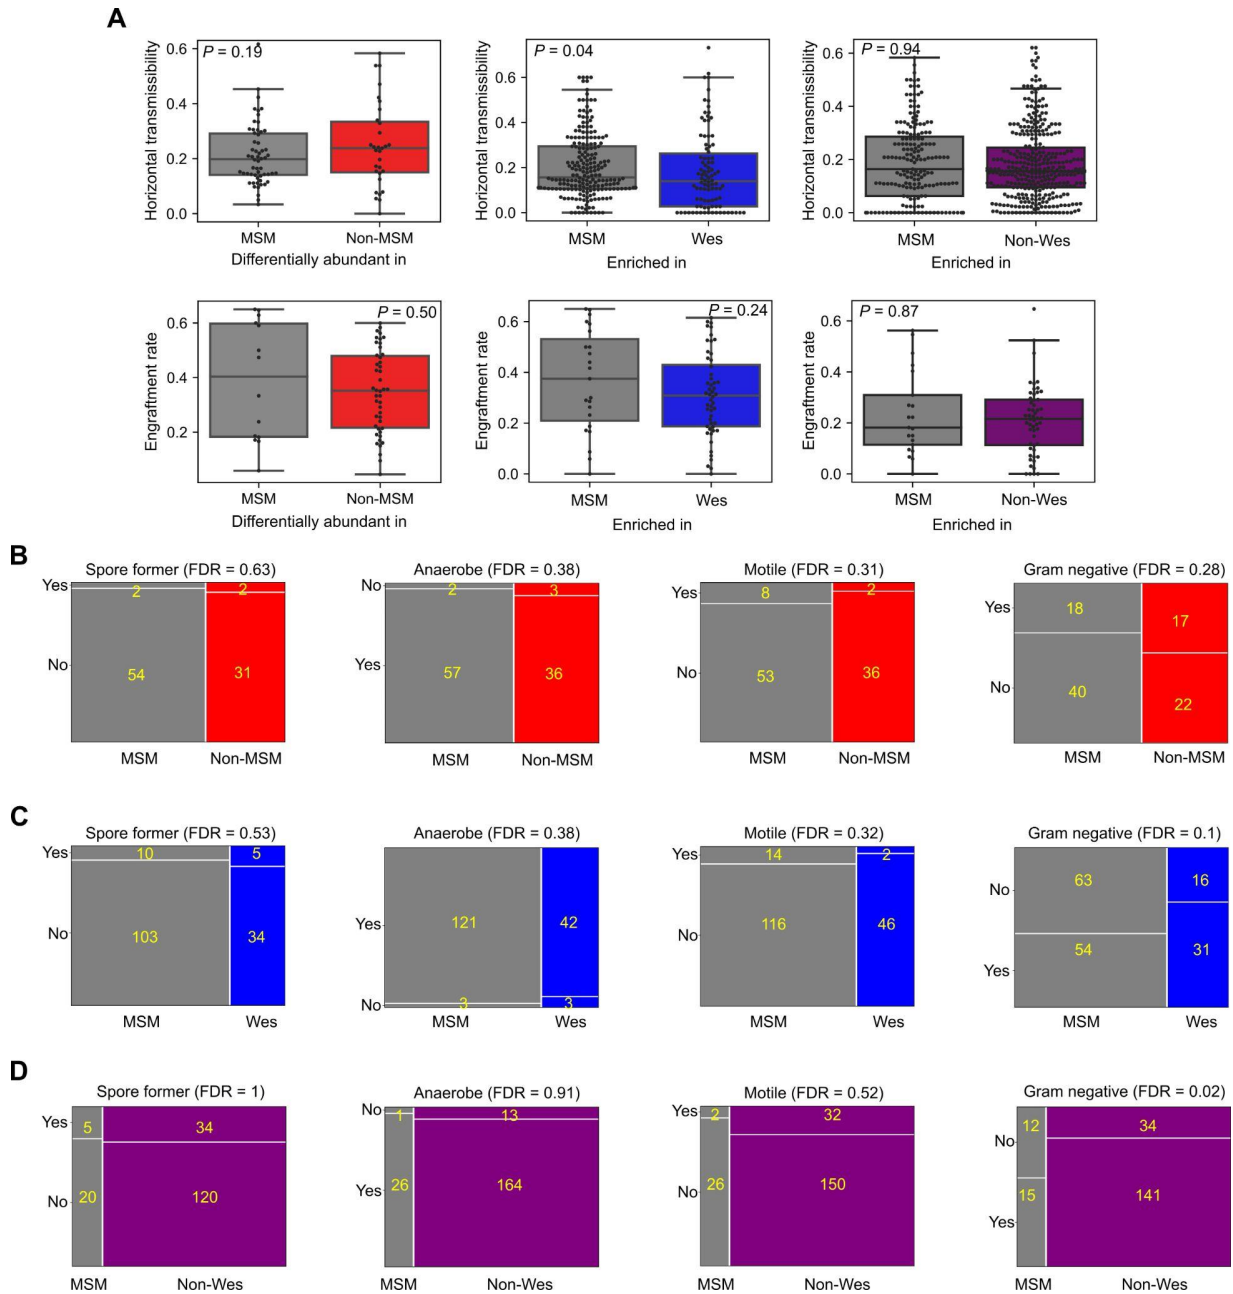

**Figure S3. Assessment of engraftment rate and horizontal transmissibility in MSM-associated species, Related to STAR Methods.** **A** Boxplots reporting the horizontal transmissibility and engraftment rates of species enriched in MSM (gray), non-MSM (red), Westernized (blue) and non-Westernized subjects (purple).  $P$  values were estimated using the Wilcoxon rank-sum test. **B**, **C** and **D** Mosaic plots showing the number of species enriched in MSM (gray) compared to non-MSM subjects (red), Westernized subjects (blue) and non-Westernized subjects (purple) for possessing transmission-related phenotypes, respectively. FDRs were estimated using Fisher's exact test followed by Benjamini-Hochberg correction for multiple hypotheses comparison.

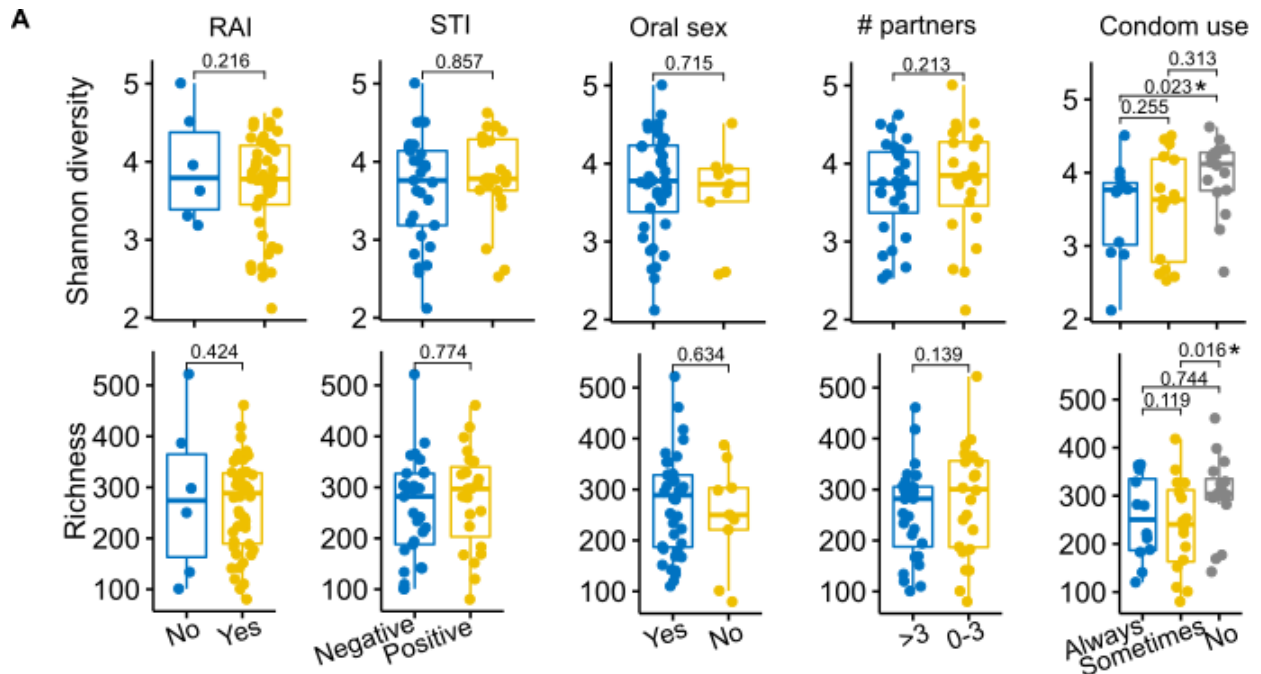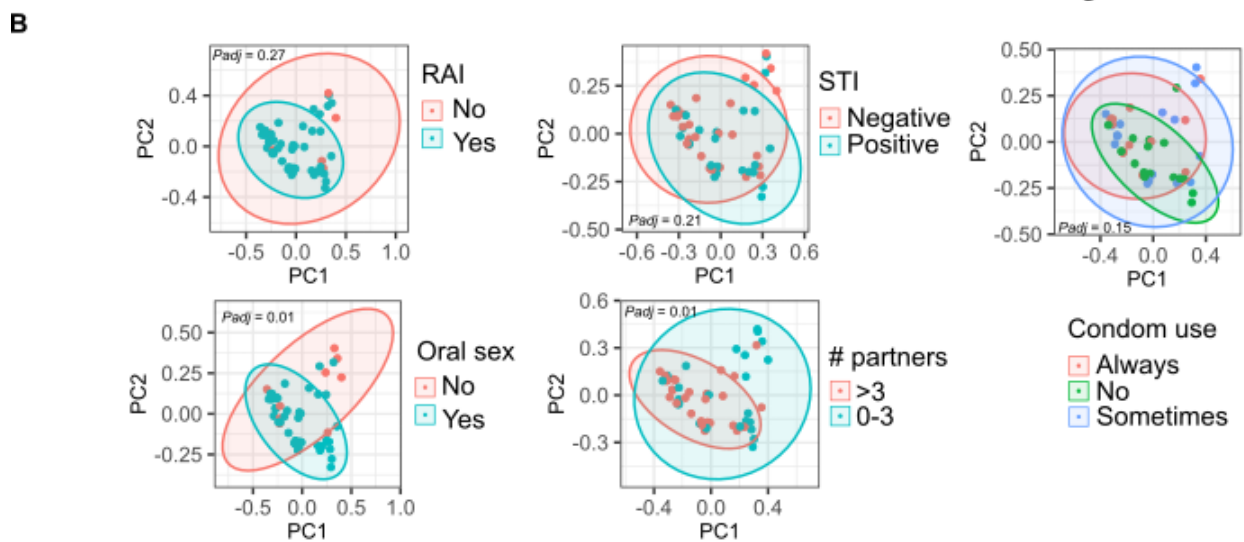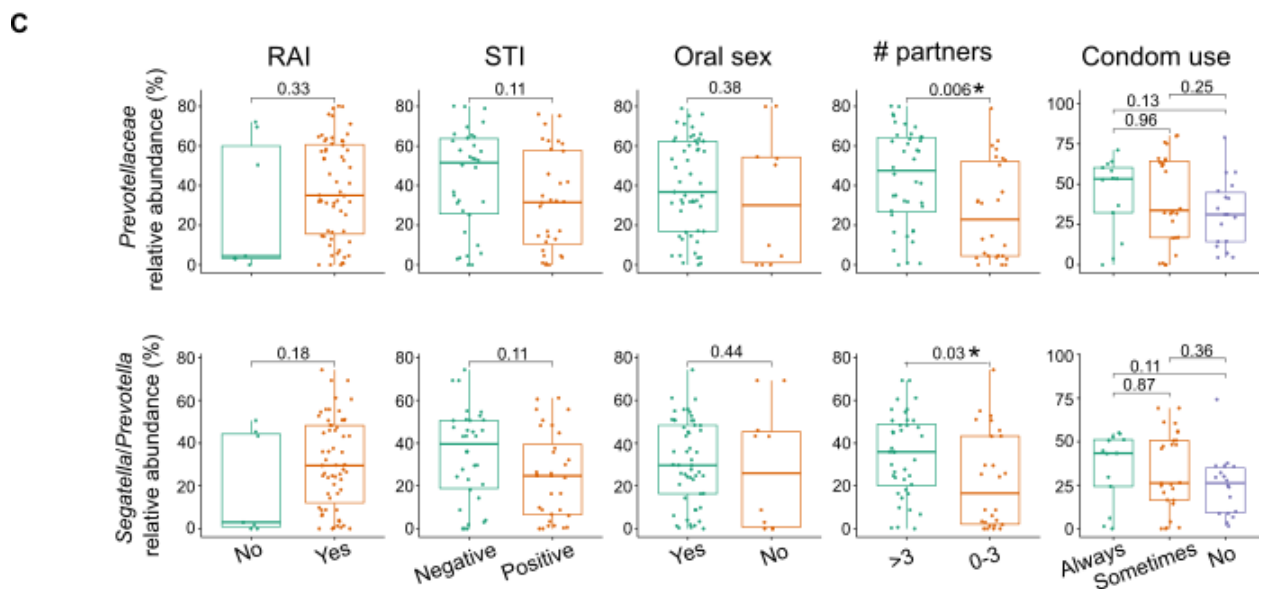

**Figure S4. Association analysis of MSM gut microbiome and sexual practices, Related to Figure 4.** **A** Boxplots reporting Shannon diversity and richness for each sexual practice. The significance was estimated by fixed effects linear models which control confounding effects. Asterisk denotes the statistical significance ( $P_{adj} < 0.05$ ). **B** Principal coordinate analysis (PCoA) based on microbial abundance profiled using MetaPhlAn 4 between groups in each sexual behavior. Covariate-controlled PERMANOVA was used to test the significance of sample separation as input using log-transformed relative abundances. **C** Boxplots reporting MetaPhlAn 4 relative abundances of members at the level of *Prevotellaceae* and *Segatella/Prevotella* for each sexual activity, and the statistical significance was measured using Wilcoxon rank-sum test. Asterisk denotes the statistical significance ( $P < 0.05$ ).



## Supplemental references

- [S1]** Blanco-Míguez, A., Beghini, F., Cumbo, F., McIver, L.J., Thompson, K.N., Zolfo, M., Manghi, P., Dubois, L., Huang, K.D., Thomas, A.M., et al. (2023). Extending and improving metagenomic taxonomic profiling with uncharacterized species using MetaPhlAn 4. *Nat. Biotechnol.* 10.1038/s41587-023-01688-w.
- [S2]** Asnicar, F., Thomas, A.M., Beghini, F., Mengoni, C., Manara, S., Manghi, P., Zhu, Q., Bolzan, M., Cumbo, F., May, U., et al. (2020). Precise phylogenetic analysis of microbial isolates and genomes from metagenomes using PhyloPhlAn 3.0. *Nat. Commun.* 11, 2500.
- [S3]** Letunic, I., and Bork, P. (2021). Interactive Tree Of Life (iTOL) v5: an online tool for phylogenetic tree display and annotation. *Nucleic Acids Res.* 49, W293–W296.
- [S4]** Ianiro, G., Punčochář, M., Karcher, N., Porcari, S., Armanini, F., Asnicar, F., Beghini, F., Blanco-Míguez, A., Cumbo, F., Manghi, P., et al. (2022). Variability of strain engraftment and predictability of microbiome composition after fecal microbiota transplantation across different diseases. *Nat. Med.* 28, 1913–1923.
- [S5]** Valles-Colomer, M., Blanco-Míguez, A., Manghi, P., Asnicar, F., Dubois, L., Golzato, D., Armanini, F., Cumbo, F., Huang, K.D., Manara, S., et al. (2023). The person-to-person transmission landscape of the gut and oral microbiomes. *Nature* 614, 125–135.
- [S6]** Bäckhed, F., Roswall, J., Peng, Y., Feng, Q., Jia, H., Kovatcheva-Datchary, P., Li, Y., Xia, Y., Xie, H., Zhong, H., et al. (2015). Dynamics and Stabilization of the Human Gut Microbiome during the First Year of Life. *Cell Host Microbe* 17, 690–703.
- [S7]** Brito, I.L., Yilmaz, S., Huang, K., Xu, L., Jupiter, S.D., Jenkins, A.P., Naisilisili, W., Tamminen, M., Smillie, C.S., Wortman, J.R., et al. (2016). Mobile genes in the human microbiome are structured from global to individual scales. *Nature* 535, 435–439.
- [S8]** De Filippis, F., Pasolli, E., Tett, A., Tarallo, S., Naccarati, A., De Angelis, M., Neviani, E., Cocolin, L., Gobbetti, M., Segata, N., et al. (2019). Distinct Genetic and Functional Traits of Human Intestinal *Prevotella copri* Strains Are Associated with Different Habitual Diets. *Cell Host Microbe* 25, 444–453.e3.
- [S9]** Structure, function and diversity of the healthy human microbiome (2012). *Nature* 486, 207–214.
- [S10]** Pasolli, E., Asnicar, F., Manara, S., Zolfo, M., Karcher, N., Armanini, F., Beghini, F., Manghi, P., Tett, A., Ghensi, P., et al. (2019). Extensive Unexplored Human Microbiome Diversity Revealed by Over 150,000 Genomes from Metagenomes Spanning Age, Geography, and Lifestyle. *Cell* 176, 649–662.e20.
- [S11]** Rampelli, S., Schnorr, S.L., Consolandi, C., Turrone, S., Severgnini, M., Peano, C., Brigidi, P., Crittenden, A.N., Henry, A.G., and Candela, M. (2015). Metagenome Sequencing of the Hadza Hunter-Gatherer Gut Microbiota. *Curr. Biol.* 25, 1682–1693.
- [S12]** Smits, S.A., Leach, J., Sonnenburg, E.D., Gonzalez, C.G., Lichtman, J.S., Reid, G.,

Knight, R., Manjurano, A., Chagalucha, J., Elias, J.E., et al. (2017). Seasonal cycling in the gut microbiome of the Hadza hunter-gatherers of Tanzania. *Science* 357, 802–806.

- [S13]** Tett, A., Huang, K.D., Asnicar, F., Fehlner-Peach, H., Pasolli, E., Karcher, N., Armanini, F., Manghi, P., Bonham, K., Zolfo, M., et al. (2019). The *Prevotella copri* Complex Comprises Four Distinct Clades Underrepresented in Westernized Populations. *Cell Host Microbe* 26, 666–679.e7.
- [S14]** Yachida, S., Mizutani, S., Shiroma, H., Shiba, S., Nakajima, T., Sakamoto, T., Watanabe, H., Masuda, K., Nishimoto, Y., Kubo, M., et al. (2019). Metagenomic and metabolomic analyses reveal distinct stage-specific phenotypes of the gut microbiota in colorectal cancer. *Nat. Med.* 25, 968–976.
- [S15]** He, Q., Gao, Y., Jie, Z., Yu, X., Laursen, J.M., Xiao, L., Li, Y., Li, L., Zhang, F., Feng, Q., et al. (2017). Two distinct metacomunities characterize the gut microbiota in Crohn's disease patients. *Gigascience* 6, 1–11.
- [S16]** Li, J., Zhao, F., Wang, Y., Chen, J., Tao, J., Tian, G., Wu, S., Liu, W., Cui, Q., Geng, B., et al. (2017). Gut microbiota dysbiosis contributes to the development of hypertension. *Microbiome* 5, 14.
